# Supplementary material
Source: PubMed Central journal article supplement (PMC10314178)
Supplement: mmc1.pdf [file mmc1.pdf]

**Estimating global and regional between-country inequality in routine  
childhood vaccine coverage in 195 countries and territories from 2019 to 2021:  
a longitudinal study**

**Authors:** Xiaozhen Lai,<sup>1,2\*</sup> Haijun Zhang,<sup>1,3,4\*</sup> Koen B. Pouwels,<sup>2</sup> Bryan Patenaude,<sup>3,4</sup> Mark Jit,<sup>5,6,7</sup>  
Hai Fang,<sup>8,9†</sup>

<sup>1</sup> Department of Health Policy and Management, School of Public Health, Peking University, Beijing, China

<sup>2</sup> Health Economics Research Centre, Nuffield Department of Population Health, University of Oxford, Oxford, UK

<sup>3</sup> Department of International Health, Johns Hopkins Bloomberg School of Public Health, Baltimore, USA

<sup>4</sup> International Vaccine Access Center, Johns Hopkins Bloomberg School of Public Health, Baltimore, USA

<sup>5</sup> Department of Infectious Disease Epidemiology, Faculty of Epidemiology and Population Health, London School of Hygiene and Tropical Medicine, London, UK

<sup>6</sup> Centre for Mathematical Modelling of Infectious Diseases, London School of Hygiene and Tropical Medicine, London, UK

<sup>7</sup> School of Public Health, University of Hong Kong, Hong Kong SAR, China

<sup>8</sup> China Center for Health Development Studies, Peking University, Beijing, China

<sup>9</sup> Peking University Health Science Center-Chinese Center for Disease Control and Prevention Joint Research Center for Vaccine Economics, Peking University, Beijing, China

## Webappendix list

- **Webappendix table 1:** Global coverage rate for 11 routine childhood vaccines from 2010 to 2021
- **Webappendix table 2:** Coverage rate for 11 routine childhood vaccines from 2019 to 2021 by WHO regions
- **Webappendix table 3:** Global slope index of inequality and relative index of inequality for 11 routine childhood vaccine coverage from 2019 to 2021 for all countries and territories with available data
- **Webappendix table 4:** Global slope index of inequality and relative index of inequality for 11 routine childhood vaccine coverage in 2019 using GBD data
- **Webappendix table 5:** Global slope index of inequality and relative index of inequality for 11 routine childhood vaccine coverage from 2019 to 2021 under different grouping strategies
- **Webappendix table 6:** Slope index of inequality and relative index of inequality for 11 routine childhood vaccine coverage from 2019 to 2021 by WHO regions
- **Webappendix table 7:** Bonferroni-adjusted results of Jonckheere-Terpstra test and Willcoxon-Mann-Whitney rank sum test by region, combining values of 11 vaccines
- **Webappendix table 8:** Changes in DTP3 coverage rate from 2019 to 2021 in 195 countries and territories
- **Webappendix table 9:** Number of DTP3 unvaccinated children in 2021 in 195 countries and territories

**Webappendix table 1: Global coverage rate for 11 routine childhood vaccines from 2010 to 2021**

| Vaccine type | 2010                   | 2011                   | 2012                   | 2013                   | 2014                   | 2015                   | 2016                   | 2017                    | 2018                   | 2019                   | 2020                   | 2021                   |
|--------------|------------------------|------------------------|------------------------|------------------------|------------------------|------------------------|------------------------|-------------------------|------------------------|------------------------|------------------------|------------------------|
| BCG          | 89.60%<br>(85.4, 93.8) | 89.90%<br>(85.4, 94.4) | 89.80%<br>(84.9, 94.6) | 89.20%<br>(84.2, 94.3) | 88.90%<br>(83.9, 94.0) | 87.90%<br>(82.9, 93.0) | 89.20%<br>(85.0, 93.3) | 89.70%<br>(85.9, 93.6)  | 89.80%<br>(86.0, 93.6) | 88.80%<br>(84.8, 92.7) | 85.80%<br>(81.5, 90.2) | 84.40%<br>(80.0, 88.8) |
| DTP1         | 88.90%<br>(84.4, 93.4) | 90.00%<br>(85.7, 94.2) | 89.60%<br>(85.0, 94.2) | 89.30%<br>(84.5, 94.2) | 89.70%<br>(84.8, 94.5) | 89.60%<br>(84.8, 94.4) | 90.20%<br>(86.3, 94.1) | 90.60%<br>(86.9, 94.2)  | 90.50%<br>(86.9, 94.1) | 90.50%<br>(86.8, 94.1) | 87.90%<br>(84.4, 91.4) | 86.40%<br>(82.5, 90.3) |
| DTP3         | 83.70%<br>(77.5, 89.8) | 84.70%<br>(79.0, 90.4) | 84.40%<br>(78.4, 90.5) | 84.10%<br>(78.0, 90.2) | 84.80%<br>(78.9, 90.7) | 85.00%<br>(79.0, 91.0) | 86.10%<br>(81.0, 91.2) | 86.10%<br>(81.1, 91.1)  | 86.30%<br>(81.2, 91.4) | 86.20%<br>(81.2, 91.3) | 83.20%<br>(78.2, 88.2) | 81.40%<br>(76.1, 86.7) |
| Pol3         | 83.40%<br>(77.0, 89.9) | 83.80%<br>(77.8, 89.8) | 83.90%<br>(77.7, 90.2) | 84.10%<br>(78.0, 90.3) | 84.70%<br>(78.6, 90.7) | 85.30%<br>(79.5, 91.1) | 85.30%<br>(80.1, 90.4) | 85.70%<br>(80.6, 90.8)  | 85.90%<br>(80.7, 91.1) | 86.30%<br>(81.4, 91.3) | 82.70%<br>(77.5, 87.9) | 80.90%<br>(75.3, 86.4) |
| RCV1         | 83.20%<br>(69.7, 96.8) | 91.10%<br>(87.5, 94.6) | 89.60%<br>(81.5, 97.7) | 92.80%<br>(90.2, 95.4) | 93.70%<br>(90.7, 96.6) | 92.20%<br>(89.9, 94.4) | 93.30%<br>(90.0, 96.6) | 69.00%<br>(38.0, 100.1) | 89.80%<br>(84.1, 95.4) | 91.50%<br>(88.1, 94.8) | 88.60%<br>(84.9, 92.3) | 86.90%<br>(82.5, 91.4) |
| MCV1         | 84.10%<br>(78.6, 89.7) | 84.50%<br>(78.8, 90.2) | 84.10%<br>(78.1, 90.1) | 84.20%<br>(78.2, 90.2) | 84.60%<br>(78.6, 90.5) | 84.90%<br>(78.8, 90.9) | 85.10%<br>(79.4, 90.8) | 85.50%<br>(80.1, 90.9)  | 86.30%<br>(80.7, 91.9) | 86.10%<br>(80.4, 91.9) | 83.70%<br>(78.5, 88.9) | 81.70%<br>(75.9, 87.5) |
| MCV2         | 79.30%<br>(65.8, 92.8) | 67.60%<br>(42.9, 92.2) | 68.20%<br>(48.5, 87.9) | 73.80%<br>(59.2, 88.4) | 73.70%<br>(61.7, 85.8) | 76.10%<br>(66.4, 85.7) | 79.60%<br>(72.3, 86.9) | 81.10%<br>(74.7, 87.6)  | 82.70%<br>(76.6, 88.7) | 76.20%<br>(65.9, 86.5) | 76.70%<br>(68.6, 84.8) | 75.80%<br>(67.5, 84.1) |
| HepB3        | 74.70%                 | 76.30%                 | 81.90%                 | 81.10%                 | 83.30%                 | 84.30%                 | 85.50%                 | 85.50%                  | 85.60%                 | 85.60%                 | 83.00%                 | 81.20%                 |

|       |              |              |              |              |              |              |              |              |              |              |              |              |
|-------|--------------|--------------|--------------|--------------|--------------|--------------|--------------|--------------|--------------|--------------|--------------|--------------|
|       | (58.5, 90.8) | (62.0, 90.6) | (74.6, 89.1) | (73.3, 88.8) | (76.9, 89.7) | (78.2, 90.5) | (80.2, 90.7) | (80.3, 90.7) | (80.2, 90.9) | (80.4, 90.9) | (78.0, 88.0) | (75.8, 86.6) |
| Hib3  | 78.40%       | 81.10%       | 77.80%       | 62.00%       | 65.60%       | 73.60%       | 82.10%       | 83.70%       | 83.80%       | 84.00%       | 80.70%       | 78.90%       |
|       | (70.5, 86.4) | (74.7, 87.5) | (66.4, 89.2) | (41.8, 82.2) | (45.3, 85.9) | (60.9, 86.3) | (77.9, 86.2) | (79.2, 88.3) | (79.1, 88.5) | (79.2, 88.8) | (76.7, 84.8) | (74.3, 83.6) |
| PCV3  | 70.70%       | 65.90%       | 73.70%       | 73.90%       | 74.50%       | 72.00%       | 75.10%       | 78.20%       | 59.30%       | 61.90%       | 61.60%       | 60.90%       |
|       | (51.4, 90.0) | (47.9, 83.9) | (60.9, 86.6) | (65.4, 82.5) | (67.3, 81.7) | (62.9, 81.1) | (68.1, 82.0) | (71.9, 84.5) | (34.9, 83.7) | (40.5, 83.4) | (43.0, 80.3) | (44.3, 77.5) |
| RotaC | 69.50%       | 76.20%       | 65.30%       | 73.40%       | 64.40%       | 70.40%       | 50.60%       | 50.10%       | 61.10%       | 66.80%       | 76.20%       | 76.50%       |
|       | (57.0, 82.0) | (64.4, 88.0) | (48.6, 82.1) | (62.8, 84.0) | (52.8, 76.0) | (60.7, 80.1) | (15.8, 85.4) | (24.5, 75.7) | (44.4, 77.7) | (56.1, 77.5) | (70.0, 82.3) | (71.2, 81.8) |

Data source: WHO-UNICEF Estimates of National Immunization Coverage (WUENIC): 2021 revision

Notes: BCG, Bacillus Calmette-Guérin vaccine; DTP, diphtheria-tetanus-pertussis vaccine; Pol, Polio vaccine; RCV, rubella-containing vaccine; MCV, measles-containing vaccine; HepB, Hepatitis B vaccine; Hib, Haemophilus influenzae type b vaccine; PCV, pneumococcal conjugate vaccine, RotaC, completed rotavirus vaccine.

**Webappendix table 2: Coverage rate for 11 routine childhood vaccines from 2019 to 2021 by WHO regions**

| Vaccine type | The African Region |                       |                       |                       | The Region of the Americas |                       |                       |                       | The Eastern Mediterranean Region |                       |                       |                       |
|--------------|--------------------|-----------------------|-----------------------|-----------------------|----------------------------|-----------------------|-----------------------|-----------------------|----------------------------------|-----------------------|-----------------------|-----------------------|
|              | N                  | 2019                  | 2020                  | 2021                  | N                          | 2019                  | 2020                  | 2021                  | N                                | 2019                  | 2020                  | 2021                  |
| BCG          | 47                 | 81.6%<br>(76.1, 87.1) | 81.3%<br>(76.8, 85.8) | 78.2%<br>(73.4, 83.1) | 27                         | 83.5%<br>(78.8, 88.3) | 68.3%<br>(50.8, 85.9) | 80.6%<br>(67.3, 93.9) | 20                               | 88.9%<br>(82.0, 95.8) | 89.4%<br>(83.8, 95.0) | 88.5%<br>(81.8, 95.2) |
| DTP1         | 47                 | 82.3%<br>(75.7, 88.9) | 81.1%<br>(75.7, 86.4) | 79.9%<br>(74.2, 85.5) | 35                         | 89.1%<br>(82.7, 95.5) | 88.2%<br>(82.1, 94.4) | 86.1%<br>(78.0, 94.1) | 22                               | 89.9%<br>(85.1, 94.7) | 86.9%<br>(81.4, 92.5) | 88.8%<br>(83.7, 93.9) |
| DTP3         | 47                 | 74.7%<br>(66.2, 83.3) | 73.0%<br>(65.3, 80.8) | 71.3%<br>(63.7, 78.9) | 35                         | 83.7%<br>(75.2, 92.2) | 80.7%<br>(72.8, 88.7) | 80.1%<br>(71.0, 89.2) | 22                               | 85.5%<br>(79.4, 91.5) | 81.3%<br>(74.1, 88.6) | 82.8%<br>(76.1, 89.4) |
| Pol3         | 47                 | 74.3%<br>(65.3, 83.3) | 71.0%<br>(63.0, 79.0) | 69.9%<br>(61.9, 77.9) | 35                         | 86.1%<br>(81.3, 90.9) | 79.8%<br>(71.9, 87.7) | 78.8%<br>(69.8, 87.9) | 22                               | 85.7%<br>(79.9, 91.6) | 83.9%<br>(77.8, 89.9) | 83.1%<br>(76.8, 89.4) |
| RCV1         | 29                 | 81.5%<br>(74.5, 88.5) | 79.0%<br>(71.4, 86.6) | 77.4%<br>(68.8, 86.1) | 35                         | 87.3%<br>(82.4, 92.2) | 85.3%<br>(80.5, 90.2) | 84.3%<br>(76.7, 91.8) | 17                               | 90.4%<br>(82.8, 98.0) | 90.2%<br>(82.7, 97.7) | 89.6%<br>(81.7, 97.6) |
| MCV1         | 47                 | 70.5%<br>(63.1, 78.0) | 69.6%<br>(63.1, 76.1) | 67.9%<br>(60.8, 74.9) | 35                         | 87.3%<br>(82.4, 92.2) | 85.3%<br>(80.5, 90.2) | 84.3%<br>(76.7, 91.8) | 22                               | 83.6%<br>(76.8, 90.4) | 83.0%<br>(76.7, 89.3) | 81.9%<br>(75.0, 88.8) |
| MCV2         | 32                 | 45.7%<br>(23.7, 67.7) | 54.0%<br>(42.5, 65.5) | 54.8%<br>(42.7, 66.8) | 35                         | 72.3%<br>(55.7, 88.8) | 72.0%<br>(53.9, 90.1) | 75.1%<br>(57.1, 93.1) | 21                               | 78.2%<br>(68.1, 88.3) | 78.9%<br>(69.2, 88.7) | 79.1%<br>(69.4, 88.7) |
| HepB3        | 47                 | 74.6%                 | 72.9%                 | 71.2%                 | 35                         | 79.3%                 | 80.7%                 | 79.6%                 | 22                               | 85.5%                 | 81.3%                 | 82.7%                 |

| Hib3         | 47                  | (66.1, 83.2) | (65.1, 80.7) | (63.5, 78.8) | 35                          | (69.2, 89.5) | (74.0, 87.3) | (71.3, 87.9) | 22                         | (79.4, 91.5) | (74.1, 88.6) | (76.1, 89.4) |
|--------------|---------------------|--------------|--------------|--------------|-----------------------------|--------------|--------------|--------------|----------------------------|--------------|--------------|--------------|
|              |                     | 74.6%        | 72.8%        | 71.2%        |                             | 83.1%        | 79.9%        | 79.2%        |                            | 85.5%        | 81.3%        | 82.8%        |
|              |                     | (66.1, 83.2) | (65.1, 80.6) | (63.5, 78.8) |                             | (76.3, 89.9) | (73.1, 86.7) | (71.3, 87.2) |                            | (79.5, 91.5) | (74.1, 88.6) | (76.1, 89.4) |
| PCV3         | 40                  | 73.2%        | 71.4%        | 69.3%        | 25                          | 83.0%        | 76.8%        | 74.7%        | 16                         | 79.6%        | 75.2%        | 74.8%        |
|              |                     |              | (63.3, 83.1) | (62.4, 80.4) |                             | (60.3, 78.3) |              | (74.5, 91.6) |                            | (70.1, 83.5) | (66.9, 82.4) |              |
| RotaC        | 36                  | 69.0%        | 70.6%        | 71.6%        | 21                          | 75.9%        | 72.8%        | 71.8%        | 15                         | 77.1%        | 79.3%        | 79.3%        |
|              |                     |              | (49.8, 88.2) | (57.1, 84.1) |                             | (63.3, 79.9) |              | (68.2, 83.6) |                            | (66.5, 79.2) | (65.4, 78.2) |              |
| Vaccine type | The European Region |              |              |              | The South-East Asian Region |              |              |              | The Western Pacific Region |              |              |              |
|              | N                   | 2019         | 2020         | 2021         | N                           | 2019         | 2020         | 2021         | N                          | 2019         | 2020         | 2021         |
| BCG          | 28                  | 92.9%        | 93.5%        | 93.0%        | 11                          | 92.6%        | 87.2%        | 84.7%        | 24                         | 95.2%        | 94.0%        | 90.7%        |
|              |                     |              | (88.7, 97.2) | (89.8, 97.2) |                             | (89.0, 97.0) |              | (90.8, 94.5) |                            | (82.8, 91.7) | (80.5, 89.0) |              |
| DTP1         | 53                  | 97.5%        | 96.9%        | 96.7%        | 11                          | 94.1%        | 88.0%        | 85.8%        | 27                         | 95.5%        | 95.2%        | 92.0%        |
|              |                     |              | (96.7, 98.3) | (96.0, 97.8) |                             | (95.8, 97.6) |              | (92.4, 95.7) |                            | (84.8, 91.3) | (79.3, 92.3) |              |
| DTP3         | 53                  | 95.1%        | 93.8%        | 93.9%        | 11                          | 91.1%        | 85.5%        | 82.4%        | 27                         | 94.5%        | 94.4%        | 91.3%        |
|              |                     |              | (93.4, 96.9) | (91.9, 95.8) |                             | (92.1, 95.6) |              | (88.7, 93.5) |                            | (81.7, 89.4) | (74.6, 90.3) |              |
| Pol3         | 53                  | 94.8%        | 94.2%        | 94.1%        | 11                          | 90.4%        | 85.1%        | 82.3%        | 27                         | 95.3%        | 93.6%        | 91.1%        |
|              |                     |              | (92.9, 96.8) | (92.4, 96.0) |                             | (92.3, 95.8) |              | (88.0, 92.8) |                            | (81.2, 89.1) | (74.5, 90.1) |              |

|       |    |                       |                       |                       |    |                       |                       |                       |    |                        |                        |                        |
|-------|----|-----------------------|-----------------------|-----------------------|----|-----------------------|-----------------------|-----------------------|----|------------------------|------------------------|------------------------|
| RCV1  | 53 | 95.7%<br>(94.4, 97.0) | 93.7%<br>(91.8, 95.7) | 94.1%<br>(92.3, 96.0) | 10 | 93.9%<br>(91.2, 96.7) | 88.2%<br>(83.6, 92.8) | 86.4%<br>(79.1, 93.7) | 27 | 94.9%<br>(87.5, 100.0) | 94.6%<br>(86.4, 100.0) | 91.7%<br>(78.3, 100.0) |
| MCV1  | 53 | 95.7%<br>(94.4, 97.0) | 93.7%<br>(91.8, 95.7) | 94.1%<br>(92.3, 96.0) | 11 | 94.0%<br>(91.3, 96.6) | 88.3%<br>(83.9, 92.7) | 85.9%<br>(78.3, 93.5) | 27 | 95.1%<br>(87.9, 100.0) | 94.6%<br>(86.4, 100.0) | 91.7%<br>(78.3, 100.0) |
| MCV2  | 52 | 92.3%<br>(89.7, 94.8) | 91.6%<br>(89.2, 93.9) | 92.0%<br>(89.7, 94.2) | 11 | 83.1%<br>(78.6, 87.7) | 79.8%<br>(72.7, 86.9) | 77.5%<br>(65.4, 89.5) | 26 | 92.8%<br>(83.5, 100.0) | 93.1%<br>(82.7, 100.0) | 90.1%<br>(74.7, 100.0) |
| HepB3 | 48 | 93.9%<br>(91.5, 96.3) | 92.9%<br>(90.6, 95.2) | 93.0%<br>(90.7, 95.2) | 11 | 91.1%<br>(88.7, 93.5) | 85.5%<br>(81.7, 89.4) | 82.4%<br>(74.6, 90.3) | 27 | 94.6%<br>(86.2, 100.0) | 94.3%<br>(85.5, 100.0) | 91.1%<br>(77.1, 100.0) |
| Hib3  | 52 | 94.5%<br>(92.4, 96.5) | 93.4%<br>(91.5, 95.4) | 93.4%<br>(91.9, 94.9) | 10 | 90.9%<br>(88.5, 93.4) | 85.3%<br>(81.4, 89.2) | 82.1%<br>(73.8, 90.5) | 26 | 83.6%<br>(72.4, 94.8)  | 84.2%<br>(72.3, 96.1)  | 76.0%<br>(59.8, 92.2)  |
| PCV3  | 40 | 89.9%<br>(85.7, 94.1) | 89.1%<br>(85.8, 92.4) | 90.3%<br>(86.8, 93.8) | 6  | 24.2%<br>(-4.4, 52.9) | 28.7%<br>(2.3, 55.2)  | 30.1%<br>(6.1, 54.1)  | 17 | 70.4%<br>(47.9, 93.0)  | 77.0%<br>(61.9, 92.0)  | 68.7%<br>(45.6, 91.9)  |
| RotaC | 21 | 67.2%<br>(53.4, 81.0) | 78.5%<br>(68.1, 88.9) | 77.5%<br>(69.0, 86.0) | 1  | 53.0%<br>-            | 82.0%<br>-            | 83.0%<br>-            | 8  | 91.1%<br>(88.1, 94.0)  | 92.1%<br>(89.4, 94.7)  | 93.8%<br>(90.9, 96.8)  |

Data source: WHO-UNICEF Estimates of National Immunization Coverage (WUENIC): 2021 revision

Notes: BCG, Bacillus Calmette-Guérin vaccine; DTP, diphtheria-tetanus-pertussis vaccine; Pol, Polio vaccine; RCV, rubella-containing vaccine; MCV, measles-containing vaccine; HepB, Hepatitis B vaccine; Hib, Haemophilus influenzae type b vaccine; PCV, pneumococcal conjugate vaccine, RotaC, completed rotavirus vaccine.

**Webappendix table 3: Global slope index of inequality and relative index of inequality for 11 routine childhood vaccine coverage from 2019 to 2021 for all countries and territories with available data**

| Vaccine type               | Slope index of inequality (SII)* |                      |                      | Relative index of inequality (RII) |                      |                      |
|----------------------------|----------------------------------|----------------------|----------------------|------------------------------------|----------------------|----------------------|
|                            | 2019                             | 2020                 | 2021                 | 2019                               | 2020                 | 2021                 |
| BCG<br>(n=149, 149, 149)   | 8.3<br>(-2.7, 19.3)              | 11.3<br>(1.0, 21.5)  | 16.1<br>(5.5, 26.7)  | 1.10<br>(0.96, 1.23)               | 1.14<br>(1.01, 1.27) | 1.21<br>(1.06, 1.35) |
| DTP1<br>(n=187, 187, 187)  | 14.8<br>(9.8, 19.8)              | 18.5<br>(13.9, 23.1) | 20.8<br>(15.2, 26.4) | 1.17<br>(1.11, 1.24)               | 1.23<br>(1.16, 1.29) | 1.26<br>(1.18, 1.34) |
| DTP3<br>(n=187, 187, 187)  | 20.1<br>(13.7, 26.5)             | 23.6<br>(17.5, 29.7) | 26.9<br>(20.0, 33.8) | 1.25<br>(1.16, 1.35)               | 1.32<br>(1.22, 1.41) | 1.37<br>(1.25, 1.49) |
| Pol3<br>(n=187, 187, 187)  | 21.0<br>(14.7, 27.4)             | 24.3<br>(18.3, 30.4) | 28.5<br>(21.3, 35.8) | 1.27<br>(1.17, 1.36)               | 1.33<br>(1.23, 1.43) | 1.40<br>(1.27, 1.53) |
| RCV1<br>(n=165, 167, 167)  | 13.6<br>(8.3, 18.8)              | 16.6<br>(11.2, 21.9) | 20.5<br>(14.1, 27.0) | 1.16<br>(1.09, 1.23)               | 1.21<br>(1.13, 1.28) | 1.27<br>(1.17, 1.37) |
| MCV1<br>(n=187, 187, 187)  | 23.7<br>(17.1, 30.4)             | 25.5<br>(19.1, 32.0) | 30.0<br>(23.0, 37.0) | 1.31<br>(1.21, 1.42)               | 1.35<br>(1.24, 1.46) | 1.43<br>(1.30, 1.57) |
| MCV2<br>(n=170, 172, 176)  | 33.9<br>(23.9, 43.9)             | 36.5<br>(27.3, 45.7) | 38.9<br>(28.0, 49.7) | 1.52<br>(1.31, 1.73)               | 1.59<br>(1.38, 1.80) | 1.67<br>(1.41, 1.94) |
| HepB3<br>(n=182, 182, 183) | 18.6<br>(12.0, 25.3)             | 21.6<br>(15.3, 28.0) | 24.7<br>(17.5, 31.9) | 1.24<br>(1.14, 1.33)               | 1.29<br>(1.19, 1.39) | 1.34<br>(1.22, 1.46) |
| Hib3<br>(n=184, 185, 185)  | 18.5<br>(11.3, 25.7)             | 19.7<br>(12.5, 27.0) | 23.7<br>(16.1, 31.2) | 1.23<br>(1.13, 1.34)               | 1.26<br>(1.15, 1.37) | 1.32<br>(1.20, 1.45) |
| PCV3<br>(n=141, 143, 149)  | 17.2<br>(8.9, 25.5)              | 20.1<br>(12.0, 28.1) | 24.8<br>(15.9, 33.7) | 1.23<br>(1.10, 1.36)               | 1.28<br>(1.15, 1.41) | 1.37<br>(1.20, 1.53) |
| RotaC<br>(n=98, 105, 113)  | 1.3<br>(-13.4, 15.9)             | 4.8<br>(-7.1, 16.8)  | 6.0<br>(-5.0, 17.1)  | 1.02<br>(0.83, 1.20)               | 1.06<br>(0.90, 1.23) | 1.08<br>(0.93, 1.24) |

Data source: WHO-UNICEF Estimates of National Immunization Coverage (WUENIC): 2021 revision

Notes: \* SII is measured in percentage points. BCG, Bacillus Calmette-Guérin vaccine; DTP, diphtheria-tetanus-pertussis vaccine; Pol, Polio vaccine; RCV, rubella-containing vaccine; MCV,



measles-containing vaccine; HepB, Hepatitis B vaccine; Hib, Haemophilus influenzae type b vaccine; PCV, pneumococcal conjugate vaccine, RotaC, completed rotavirus vaccine.

**Webappendix table 4: Global slope index of inequality and relative index of inequality for 11 routine childhood vaccine coverage in 2019 using GBD data**

| Vaccine type     | Slope index of inequality (SII)* | Relative index of inequality (RII) |
|------------------|----------------------------------|------------------------------------|
| BCG<br>(n=149)   | 11.4<br>(5.2, 17.6)              | 1.14<br>(1.06, 1.22)               |
| DTP1<br>(n=187)  | 17.9<br>(15.0, 20.9)             | 1.22<br>(1.18, 1.26)               |
| DTP3<br>(n=187)  | 23.5<br>(19.8, 27.3)             | 1.31<br>(1.25, 1.37)               |
| Pol3<br>(n=187)  | 24.7<br>(20.9, 28.5)             | 1.33<br>(1.27, 1.40)               |
| RCV1<br>(n=165)  | 17.3<br>(14.0, 20.6)             | 1.22<br>(1.17, 1.27)               |
| MCV1<br>(n=187)  | 26.5<br>(22.7, 30.4)             | 1.37<br>(1.30, 1.43)               |
| MCV2<br>(n=170)  | 33.5<br>(28.1, 38.9)             | 1.52<br>(1.41, 1.64)               |
| HepB3<br>(n=182) | 21.7<br>(17.9, 25.6)             | 1.29<br>(1.23, 1.35)               |
| Hib3<br>(n=184)  | 21.1<br>(16.8, 25.3)             | 1.28<br>(1.21, 1.34)               |
| PCV3<br>(n=141)  | 19.6<br>(14.9, 24.4)             | 1.27<br>(1.19, 1.35)               |
| RotaC<br>(n=98)  | 4.8<br>(-2.5, 12.2)              | 1.06<br>(0.96, 1.16)               |

Data source: Global Burden of Disease Study 2020, Release 1 (GBD 2020 R1) Routine Childhood Vaccination Coverage 1980-2019

Notes: \* SII is measured in percentage points. BCG, Bacillus Calmette-Guérin vaccine; DTP,

diphtheria-tetanus-pertussis vaccine; Pol, Polio vaccine; RCV, rubella-containing vaccine; MCV, measles-containing vaccine; HepB, Hepatitis B vaccine; Hib, Haemophilus influenzae type b vaccine; PCV, pneumococcal conjugate vaccine, RotaC, completed rotavirus vaccine.

**Webappendix table 5: Global slope index of inequality and relative index of inequality for 11 routine childhood vaccine coverage from 2019 to 2021 under different grouping strategies**

| Vaccine type                            | Slope index of inequality (SII)* |                      |                      | Relative index of inequality (RII) |                      |                      |
|-----------------------------------------|----------------------------------|----------------------|----------------------|------------------------------------|----------------------|----------------------|
|                                         | 2019                             | 2020                 | 2021                 | 2019                               | 2020                 | 2021                 |
| <b>Grouping strategy 1: 4 quartiles</b> |                                  |                      |                      |                                    |                      |                      |
| BCG<br>(n=149)                          | 6.5<br>(-3.8, 16.8)              | 9.6<br>(-0.7, 19.8)  | 15.2<br>(4.7, 25.6)  | 1.08<br>(0.95, 1.20)               | 1.12<br>(0.99, 1.24) | 1.19<br>(1.05, 1.34) |
| DTP1<br>(n=187)                         | 14.6<br>(9.6, 19.5)              | 18.3<br>(13.6, 23.0) | 19.6<br>(13.8, 25.5) | 1.17<br>(1.11, 1.23)               | 1.22<br>(1.16, 1.29) | 1.24<br>(1.16, 1.33) |
| DTP3<br>(n=187)                         | 20.2<br>(13.7, 26.6)             | 24.3<br>(18.1, 30.5) | 25<br>(17.7, 32.3)   | 1.26<br>(1.16, 1.35)               | 1.33<br>(1.23, 1.43) | 1.34<br>(1.22, 1.46) |
| Pol3<br>(n=187)                         | 21.2<br>(14.8, 27.7)             | 25.3<br>(19.2, 31.4) | 26.6<br>(18.8, 34.3) | 1.27<br>(1.18, 1.37)               | 1.34<br>(1.24, 1.45) | 1.37<br>(1.24, 1.50) |
| RCV1<br>(n=165)                         | 14.9<br>(9.3, 20.5)              | 17.4<br>(11.8, 23.1) | 21.4<br>(14.7, 28.2) | 1.18<br>(1.10, 1.25)               | 1.22<br>(1.14, 1.30) | 1.28<br>(1.18, 1.39) |
| MCV1<br>(n=187)                         | 24<br>(17.4, 30.7)               | 26.7<br>(20.1, 33.3) | 27.4<br>(19.4, 35.4) | 1.32<br>(1.21, 1.42)               | 1.37<br>(1.26, 1.49) | 1.39<br>(1.25, 1.53) |
| MCV2<br>(n=170)                         | 33.2<br>(23.2, 43.2)             | 34.9<br>(26.0, 43.7) | 32.5<br>(22.9, 42.0) | 1.51<br>(1.30, 1.71)               | 1.55<br>(1.36, 1.74) | 1.52<br>(1.32, 1.71) |
| HepB3<br>(n=182)                        | 18.9<br>(12.2, 25.6)             | 22.5<br>(16.1, 28.9) | 22.3<br>(14.7, 30.0) | 1.24<br>(1.14, 1.34)               | 1.3<br>(1.20, 1.40)  | 1.3<br>(1.18, 1.43)  |
| Hib3<br>(n=184)                         | 19.2<br>(11.2, 27.1)             | 21.3<br>(13.4, 29.1) | 24.5<br>(16.0, 33.0) | 1.24<br>(1.13, 1.36)               | 1.28<br>(1.16, 1.40) | 1.34<br>(1.20, 1.48) |
| PCV3<br>(n=141)                         | 17.9<br>(8.1, 27.6)              | 16.6<br>(6.9, 26.3)  | 22.5<br>(11.9, 33.1) | 1.24<br>(1.09, 1.39)               | 1.23<br>(1.08, 1.37) | 1.32<br>(1.14, 1.50) |

|                 |                      |                       |                     |                      |                      |                      |
|-----------------|----------------------|-----------------------|---------------------|----------------------|----------------------|----------------------|
| RotaC<br>(n=98) | 0.7<br>(-15.5, 16.8) | -0.8<br>(-14.0, 12.4) | 5.5<br>(-7.3, 18.3) | 1.01<br>(0.80, 1.21) | 0.99<br>(0.82, 1.16) | 1.08<br>(0.90, 1.25) |
|-----------------|----------------------|-----------------------|---------------------|----------------------|----------------------|----------------------|

**Grouping strategy 2: 10 deciles**

|                  |                      |                      |                      |                      |                      |                      |
|------------------|----------------------|----------------------|----------------------|----------------------|----------------------|----------------------|
| BCG<br>(n=149)   | 9<br>(-1.8, 19.8)    | 11.3<br>(0.9, 21.7)  | 16.1<br>(4.9, 27.2)  | 1.11<br>(0.97, 1.24) | 1.14<br>(1.00, 1.27) | 1.2<br>(1.05, 1.36)  |
| DTP1<br>(n=187)  | 14.8<br>(9.8, 19.7)  | 18.3<br>(13.6, 22.9) | 20<br>(14.5, 25.5)   | 1.17<br>(1.11, 1.24) | 1.22<br>(1.16, 1.29) | 1.25<br>(1.17, 1.33) |
| DTP3<br>(n=187)  | 19.9<br>(13.6, 26.2) | 23.3<br>(17.3, 29.4) | 25.9<br>(19.2, 32.6) | 1.25<br>(1.16, 1.34) | 1.31<br>(1.21, 1.41) | 1.36<br>(1.24, 1.47) |
| Pol3<br>(n=187)  | 21<br>(14.8, 27.3)   | 24.1<br>(18.1, 30.1) | 27.5<br>(20.5, 34.5) | 1.27<br>(1.17, 1.36) | 1.33<br>(1.23, 1.42) | 1.39<br>(1.26, 1.51) |
| RCV1<br>(n=165)  | 13.3<br>(8.1, 18.5)  | 16.5<br>(11.3, 21.6) | 20.3<br>(14.2, 26.5) | 1.16<br>(1.09, 1.23) | 1.21<br>(1.13, 1.28) | 1.27<br>(1.17, 1.36) |
| MCV1<br>(n=187)  | 23.1<br>(16.6, 29.7) | 24.9<br>(18.4, 31.3) | 28.7<br>(21.9, 35.6) | 1.3<br>(1.20, 1.41)  | 1.34<br>(1.23, 1.45) | 1.41<br>(1.29, 1.54) |
| MCV2<br>(n=170)  | 34.5<br>(24.5, 44.5) | 34.3<br>(26.0, 42.6) | 31.7<br>(22.2, 41.1) | 1.53<br>(1.32, 1.74) | 1.54<br>(1.36, 1.72) | 1.5<br>(1.31, 1.69)  |
| HepB3<br>(n=182) | 18<br>(11.4, 24.6)   | 21.2<br>(14.9, 27.5) | 24<br>(17.0, 31.0)   | 1.23<br>(1.13, 1.32) | 1.28<br>(1.18, 1.38) | 1.33<br>(1.21, 1.45) |
| Hib3<br>(n=184)  | 19.7<br>(13.3, 26.1) | 21.8<br>(15.7, 27.9) | 25<br>(18.3, 31.7)   | 1.25<br>(1.16, 1.34) | 1.29<br>(1.19, 1.39) | 1.34<br>(1.23, 1.46) |
| PCV3<br>(n=141)  | 16.6<br>(8.9, 24.3)  | 18.9<br>(11.7, 26.0) | 23.4<br>(15.4, 31.4) | 1.22<br>(1.10, 1.34) | 1.26<br>(1.15, 1.38) | 1.34<br>(1.20, 1.48) |
| RotaC<br>(n=98)  | 3.5<br>(-10.3, 17.3) | 4.1<br>(-7.5, 15.8)  | 7.6<br>(-4.3, 19.5)  | 1.05<br>(0.86, 1.23) | 1.05<br>(0.90, 1.21) | 1.1<br>(0.93, 1.28)  |

**Grouping strategy 3: 4 income groups**

|                |                     |                     |                   |                      |                      |                      |
|----------------|---------------------|---------------------|-------------------|----------------------|----------------------|----------------------|
| BCG<br>(n=149) | 9.8<br>(-0.9, 20.4) | 11.5<br>(1.3, 21.8) | 17<br>(6.2, 27.8) | 1.12<br>(0.98, 1.25) | 1.14<br>(1.01, 1.27) | 1.22<br>(1.07, 1.37) |
| DTP1           | 15.8                | 18.2                | 21.7              | 1.19                 | 1.22                 | 1.28                 |

|         |               |              |              |              |              |              |
|---------|---------------|--------------|--------------|--------------|--------------|--------------|
| (n=187) | (10.7, 20.8)  | (13.4, 23.1) | (16.0, 27.5) | (1.12, 1.25) | (1.16, 1.29) | (1.19, 1.36) |
| DTP3    | 21.5          | 23.4         | 27.6         | 1.28         | 1.32         | 1.39         |
| (n=187) | (15.2, 27.7)  | (17.2, 29.5) | (20.9, 34.3) | (1.18, 1.37) | (1.22, 1.42) | (1.27, 1.51) |
| Pol3    | 22.1          | 24.6         | 30.3         | 1.29         | 1.34         | 1.44         |
| (n=187) | (16.0, 28.2)  | (18.7, 30.5) | (22.4, 38.2) | (1.19, 1.38) | (1.24, 1.44) | (1.29, 1.59) |
| RCV1    | 14.2          | 17.2         | 20.6         | 1.17         | 1.22         | 1.27         |
| (n=165) | (9.1, 19.2)   | (11.9, 22.5) | (14.5, 26.8) | (1.10, 1.24) | (1.14, 1.30) | (1.18, 1.37) |
| MCV1    | 23.1          | 25.1         | 29.8         | 1.3          | 1.35         | 1.44         |
| (n=187) | (16.7, 29.4)  | (18.9, 31.4) | (23.2, 36.4) | (1.20, 1.41) | (1.24, 1.46) | (1.31, 1.56) |
| MCV2    | 35.3          | 33.8         | 33.1         | 1.55         | 1.54         | 1.54         |
| (n=170) | (25.6, 45.0)  | (25.7, 41.9) | (24.2, 42.1) | (1.34, 1.76) | (1.36, 1.71) | (1.34, 1.73) |
| HepB3   | 19.8          | 21.5         | 25.7         | 1.26         | 1.29         | 1.36         |
| (n=182) | (13.3, 26.3)  | (15.1, 27.8) | (18.8, 32.6) | (1.16, 1.35) | (1.19, 1.39) | (1.24, 1.48) |
| Hib3    | 21.4          | 23.5         | 27.2         | 1.28         | 1.32         | 1.39         |
| (n=184) | (15.1, 27.8)  | (17.3, 29.7) | (20.4, 34.0) | (1.18, 1.38) | (1.22, 1.42) | (1.26, 1.51) |
| PCV3    | 20.7          | 20.3         | 24.1         | 1.29         | 1.29         | 1.35         |
| (n=141) | (11.8, 29.7)  | (12.0, 28.6) | (15.2, 33.1) | (1.14, 1.44) | (1.15, 1.42) | (1.19, 1.52) |
| RotaC   | 3.1           | 5            | 8.4          | 1.04         | 1.07         | 1.12         |
| (n=98)  | (-11.0, 17.3) | (-7.2, 17.1) | (-3.4, 20.3) | (0.85, 1.23) | (0.90, 1.23) | (0.94, 1.29) |

Data source: WHO-UNICEF Estimates of National Immunization Coverage (WUENIC): 2021 revision

Notes: \* SII is measured in percentage points. BCG, Bacillus Calmette-Guérin vaccine; DTP, diphtheria-tetanus-pertussis vaccine; Pol, Polio vaccine; RCV, rubella-containing vaccine; MCV, measles-containing vaccine; HepB, Hepatitis B vaccine; Hib, Haemophilus influenzae type b vaccine; PCV, pneumococcal conjugate vaccine, RotaC, completed rotavirus vaccine.

**Webappendix table 6: Slope index of inequality and relative index of inequality for 11 routine childhood vaccine coverage from 2019 to 2021 by WHO regions**

| Vaccine type                      | Slope index of inequality (SII)* |                       |                       | Relative index of inequality (RII) |                      |                      |
|-----------------------------------|----------------------------------|-----------------------|-----------------------|------------------------------------|----------------------|----------------------|
|                                   | 2019                             | 2020                  | 2021                  | 2019                               | 2020                 | 2021                 |
| <b>The African Region</b>         |                                  |                       |                       |                                    |                      |                      |
| BCG<br>(n=45)                     | 15.7<br>(4.6, 26.9)              | 16.3<br>(5.7, 26.9)   | 23.4<br>(7.7, 39.1)   | 1.20<br>(1.04, 1.35)               | 1.21<br>(1.06, 1.36) | 1.32<br>(1.07, 1.58) |
| DTP1<br>(n=45)                    | 6.1<br>(-6.4, 18.7)              | 7.1<br>(-5.7, 19.9)   | 10.8<br>(-4.0, 25.5)  | 1.07<br>(0.92, 1.23)               | 1.09<br>(0.92, 1.25) | 1.14<br>(0.94, 1.33) |
| DTP3<br>(n=45)                    | 8.1<br>(-9.0, 25.2)              | 10.4<br>(-6.3, 27.1)  | 13.8<br>(-4.8, 32.5)  | 1.11<br>(0.87, 1.34)               | 1.14<br>(0.90, 1.38) | 1.19<br>(0.91, 1.48) |
| Pol3<br>(n=45)                    | 8.9<br>(-8.1, 25.8)              | 10.2<br>(-6.3, 26.8)  | 13.3<br>(-6.8, 33.5)  | 1.12<br>(0.88, 1.35)               | 1.14<br>(0.90, 1.39) | 1.19<br>(0.87, 1.51) |
| RCV1<br>(n=28)                    | -3.1<br>(-18.6, 12.4)            | -1.6<br>(-15.0, 11.9) | 0.1<br>(-14.1, 14.3)  | 0.96<br>(0.79, 1.14)               | 0.98<br>(0.82, 1.14) | 1.00<br>(0.83, 1.18) |
| MCV1<br>(n=45)                    | 8.7<br>(-10.0, 27.5)             | 10.2<br>(-7.8, 28.1)  | 10.7<br>(-9.9, 31.3)  | 1.12<br>(0.85, 1.39)               | 1.15<br>(0.87, 1.42) | 1.16<br>(0.83, 1.48) |
| MCV2<br>(n=31)                    | 20.1<br>(-13.8, 53.9)            | 17.6<br>(-6.4, 41.7)  | 4.9<br>(-20.0, 29.8)  | 1.37<br>(0.63, 2.12)               | 1.31<br>(0.81, 1.81) | 1.08<br>(0.67, 1.49) |
| HepB3<br>(n=45)                   | 8.1<br>(-9.1, 25.3)              | 10.6<br>(-6.2, 27.3)  | 13.5<br>(-5.5, 32.6)  | 1.11<br>(0.87, 1.34)               | 1.14<br>(0.90, 1.39) | 1.19<br>(0.90, 1.48) |
| Hib3<br>(n=45)                    | 8.1<br>(-9.1, 25.3)              | 10.6<br>(-6.2, 27.3)  | 13.5<br>(-5.5, 32.6)  | 1.11<br>(0.87, 1.34)               | 1.14<br>(0.90, 1.39) | 1.19<br>(0.90, 1.48) |
| PCV3<br>(n=39)                    | 3.9<br>(-14.9, 22.7)             | 12.5<br>(-3.9, 28.9)  | 10.5<br>(-11.4, 32.4) | 1.05<br>(0.80, 1.29)               | 1.17<br>(0.92, 1.42) | 1.15<br>(0.82, 1.47) |
| RotaC<br>(n=35)                   | 11.0<br>(-17.5, 39.4)            | 6.0<br>(-17.1, 29.1)  | 0.4<br>(-25.4, 26.2)  | 1.15<br>(0.74, 1.56)               | 1.08<br>(0.76, 1.40) | 1.01<br>(0.66, 1.35) |
| <b>The Region of the Americas</b> |                                  |                       |                       |                                    |                      |                      |
| BCG<br>(n=26)                     | 13.7<br>(2.8, 24.5)              | 14.4<br>(-0.3, 29.2)  | 20.3<br>(9.5, 31.0)   | 1.16<br>(1.02, 1.30)               | 1.18<br>(0.98, 1.38) | 1.26<br>(1.10, 1.42) |

|                 |                       |                      |                      |                      |                      |                      |
|-----------------|-----------------------|----------------------|----------------------|----------------------|----------------------|----------------------|
| DTP1<br>(n=34)  | 10.1<br>(1.8, 18.5)   | 17.9<br>(5.9, 29.8)  | 14.9<br>(5.3, 24.6)  | 1.12<br>(1.01, 1.22) | 1.22<br>(1.05, 1.39) | 1.19<br>(1.06, 1.32) |
| DTP3<br>(n=34)  | 11.0<br>(-1.4, 23.5)  | 23.1<br>(7.4, 38.9)  | 17.6<br>(4.5, 30.7)  | 1.13<br>(0.97, 1.30) | 1.32<br>(1.06, 1.58) | 1.24<br>(1.04, 1.44) |
| Pol3<br>(n=34)  | 13.2<br>(0.3, 26.0)   | 24.4<br>(9.0, 39.9)  | 20.9<br>(7.0, 34.9)  | 1.16<br>(0.99, 1.33) | 1.35<br>(1.08, 1.61) | 1.30<br>(1.07, 1.52) |
| RCV1<br>(n=34)  | 11.7<br>(0.4, 22.9)   | 18.2<br>(4.2, 32.3)  | 18.9<br>(8.0, 29.9)  | 1.14<br>(0.99, 1.29) | 1.24<br>(1.03, 1.45) | 1.26<br>(1.09, 1.43) |
| MCV1<br>(n=34)  | 11.7<br>(0.4, 22.9)   | 18.2<br>(4.2, 32.3)  | 18.9<br>(8.0, 29.9)  | 1.14<br>(0.99, 1.29) | 1.24<br>(1.03, 1.45) | 1.26<br>(1.09, 1.43) |
| MCV2<br>(n=34)  | 21.7<br>(-0.2, 43.6)  | 31.8<br>(8.7, 54.9)  | 24.6<br>(7.0, 42.2)  | 1.31<br>(0.93, 1.69) | 1.52<br>(1.01, 2.03) | 1.39<br>(1.05, 1.73) |
| HepB3<br>(n=34) | 10.4<br>(-2.5, 23.2)  | 21.7<br>(6.1, 37.3)  | 16.7<br>(3.7, 29.7)  | 1.13<br>(0.96, 1.29) | 1.30<br>(1.05, 1.55) | 1.23<br>(1.03, 1.42) |
| Hib3<br>(n=34)  | 12.0<br>(-0.5, 24.5)  | 23.1<br>(7.3, 39.0)  | 17.7<br>(4.6, 30.9)  | 1.15<br>(0.98, 1.31) | 1.32<br>(1.06, 1.59) | 1.24<br>(1.04, 1.44) |
| PCV3<br>(n=24)  | 14.6<br>(-4.5, 33.8)  | 14.2<br>(-2.0, 30.4) | 21.6<br>(4.1, 39.1)  | 1.19<br>(0.91, 1.46) | 1.19<br>(0.95, 1.44) | 1.31<br>(1.01, 1.62) |
| RotaC<br>(n=20) | -14.9<br>(-38.4, 8.6) | 12.4<br>(-7.8, 32.7) | 16.2<br>(-2.2, 34.6) | 0.83<br>(0.60, 1.07) | 1.17<br>(0.87, 1.47) | 1.24<br>(0.93, 1.55) |

#### The Eastern Mediterranean Region

|                |                       |                       |                      |                      |                      |                      |
|----------------|-----------------------|-----------------------|----------------------|----------------------|----------------------|----------------------|
| BCG<br>(n=19)  | 18.1<br>(-20.4, 56.7) | 21.2<br>(-12.8, 55.2) | 26.7<br>(-5.0, 58.4) | 1.23<br>(0.67, 1.79) | 1.28<br>(0.76, 1.79) | 1.37<br>(0.83, 1.90) |
| DTP1<br>(n=21) | 23.3<br>(-1.8, 48.5)  | 16.7<br>(-7.9, 41.3)  | 20.1<br>(-3.6, 43.7) | 1.29<br>(0.92, 1.67) | 1.21<br>(0.86, 1.55) | 1.25<br>(0.91, 1.60) |
| DTP3<br>(n=21) | 27.8<br>(-1.1, 56.7)  | 20.0<br>(-8.7, 48.8)  | 31.9<br>(6.8, 56.9)  | 1.37<br>(0.90, 1.85) | 1.27<br>(0.82, 1.72) | 1.47<br>(1.00, 1.94) |
| Pol3<br>(n=21) | 27.2<br>(0.1, 54.2)   | 16.0<br>(-11.8, 43.8) | 30.9<br>(7.4, 54.5)  | 1.36<br>(0.92, 1.81) | 1.21<br>(0.80, 1.62) | 1.45<br>(1.02, 1.88) |
| RCV1           | 5.6                   | 5.9                   | 15.6                 | 1.06                 | 1.07                 | 1.19                 |

|                 |                       |                       |                       |                      |                      |                      |
|-----------------|-----------------------|-----------------------|-----------------------|----------------------|----------------------|----------------------|
| (n=16)          | (-21.9, 33.0)         | (-20.2, 32.0)         | (-11.4, 42.6)         | (0.75, 1.38)         | (0.76, 1.38)         | (0.83, 1.55)         |
| MCV1<br>(n=21)  | 32.5<br>(5.7, 59.4)   | 24.9<br>(-1.9, 51.7)  | 33.2<br>(9.6, 56.8)   | 1.46<br>(0.97, 1.94) | 1.35<br>(0.90, 1.79) | 1.50<br>(1.04, 1.95) |
| MCV2<br>(n=20)  | 41.4<br>(8.0, 74.7)   | 38.1<br>(6.4, 69.7)   | 47.7<br>(23.3, 72.1)  | 1.65<br>(0.93, 2.37) | 1.59<br>(0.92, 2.26) | 1.80<br>(1.17, 2.44) |
| HepB3<br>(n=21) | 27.1<br>(-1.9, 56.2)  | 20.2<br>(-8.6, 48.9)  | 31.3<br>(6.4, 56.3)   | 1.37<br>(0.89, 1.84) | 1.27<br>(0.82, 1.72) | 1.46<br>(0.99, 1.93) |
| Hib3<br>(n=21)  | 28.1<br>(-0.7, 56.9)  | 20.0<br>(-8.7, 48.8)  | 31.9<br>(6.8, 56.9)   | 1.38<br>(0.90, 1.86) | 1.27<br>(0.82, 1.72) | 1.47<br>(1.00, 1.94) |
| PCV3<br>(n=16)  | 11.4<br>(-20.8, 43.6) | -0.6<br>(-43.1, 41.9) | 14.4<br>(-31.2, 59.9) | 1.14<br>(0.72, 1.57) | 0.99<br>(0.47, 1.51) | 1.20<br>(0.53, 1.86) |
| RotaC<br>(n=15) | -0.3<br>(-49.7, 49.0) | -0.1<br>(-35.9, 35.7) | 10.6<br>(-22.4, 43.6) | 1.00<br>(0.39, 1.60) | 1.00<br>(0.56, 1.44) | 1.14<br>(0.67, 1.61) |

#### The European Region

|                 |                        |                        |                       |                      |                      |                      |
|-----------------|------------------------|------------------------|-----------------------|----------------------|----------------------|----------------------|
| BCG<br>(n=27)   | -27.1<br>(-67.1, 12.8) | -27.2<br>(-66.7, 12.2) | -30.3<br>(-69.4, 8.9) | 0.74<br>(0.38, 1.09) | 0.73<br>(0.38, 1.09) | 0.71<br>(0.36, 1.05) |
| DTP1<br>(n=52)  | 1.5<br>(-1.7, 4.6)     | 5.0<br>(1.6, 8.5)      | 5.0<br>(1.9, 8.1)     | 1.02<br>(0.98, 1.05) | 1.05<br>(1.02, 1.09) | 1.05<br>(1.02, 1.09) |
| DTP3<br>(n=52)  | 3.0<br>(-3.0, 9.0)     | 8.2<br>(2.0, 14.3)     | 7.4<br>(1.2, 13.7)    | 1.03<br>(0.97, 1.10) | 1.09<br>(1.02, 1.17) | 1.08<br>(1.01, 1.16) |
| Pol3<br>(n=52)  | 2.6<br>(-3.5, 8.8)     | 7.6<br>(1.7, 13.5)     | 6.8<br>(0.5, 13.1)    | 1.03<br>(0.96, 1.10) | 1.09<br>(1.02, 1.15) | 1.08<br>(1.00, 1.15) |
| RCV1<br>(n=52)  | 7.2<br>(-5.4, 19.8)    | 16.2<br>(2.6, 29.8)    | 12.1<br>(1.8, 22.3)   | 1.08<br>(0.93, 1.23) | 1.20<br>(1.01, 1.39) | 1.14<br>(1.01, 1.28) |
| MCV1<br>(n=52)  | 7.2<br>(-5.4, 19.8)    | 16.2<br>(2.6, 29.8)    | 12.1<br>(1.8, 22.3)   | 1.08<br>(0.93, 1.23) | 1.20<br>(1.01, 1.39) | 1.14<br>(1.01, 1.28) |
| MCV2<br>(n=51)  | -5.5<br>(-11.5, 0.6)   | 3.9<br>(-4.0, 11.8)    | -6.7<br>(-22.9, 9.5)  | 0.94<br>(0.88, 1.00) | 1.05<br>(0.95, 1.14) | 0.93<br>(0.75, 1.10) |
| HepB3<br>(n=47) | 1.3<br>(-8.4, 11.0)    | 8.8<br>(-1.5, 19.2)    | 6.1<br>(-2.4, 14.7)   | 1.01<br>(0.91, 1.12) | 1.10<br>(0.98, 1.23) | 1.07<br>(0.97, 1.17) |

|                 |                      |                       |                       |                      |                      |                      |
|-----------------|----------------------|-----------------------|-----------------------|----------------------|----------------------|----------------------|
| Hib3<br>(n=51)  | 3.6<br>(-2.8, 10.1)  | 8.6<br>(2.1, 15.2)    | 7.0<br>(0.8, 13.3)    | 1.04<br>(0.97, 1.11) | 1.10<br>(1.02, 1.18) | 1.08<br>(1.01, 1.15) |
| PCV3<br>(n=40)  | 0.0<br>(-7.6, 7.6)   | 6.0<br>(-1.4, 13.4)   | 3.4<br>(-3.6, 10.4)   | 1.00<br>(0.92, 1.09) | 1.07<br>(0.98, 1.16) | 1.04<br>(0.96, 1.12) |
| RotaC<br>(n=20) | 27.1<br>(-9.9, 64.1) | 14.4<br>(-21.2, 49.9) | 18.8<br>(-16.1, 53.6) | 1.46<br>(0.64, 2.28) | 1.21<br>(0.61, 1.82) | 1.29<br>(0.65, 1.93) |

**The South-East Asian Region**

|                 |                            |                             |                        |                       |                       |                       |
|-----------------|----------------------------|-----------------------------|------------------------|-----------------------|-----------------------|-----------------------|
| BCG<br>(n=10)   | 4.2<br>(-6.6, 15.1)        | 16.2<br>(3.1, 29.4)         | 32.3<br>(-16.9, 81.4)  | 1.05<br>(0.93, 1.16)  | 1.19<br>(1.02, 1.36)  | 1.44<br>(0.57, 2.31)  |
| DTP1<br>(n=10)  | 7.6<br>(-2.6, 17.8)        | 13.5<br>(-1.0, 28.1)        | 28.8<br>(-24.7, 82.4)  | 1.08<br>(0.97, 1.20)  | 1.16<br>(0.98, 1.34)  | 1.39<br>(0.48, 2.31)  |
| DTP3<br>(n=10)  | 8.0<br>(-4.7, 20.6)        | 15.3<br>(-4.0, 34.6)        | 30.8<br>(-31.5, 93.1)  | 1.09<br>(0.94, 1.23)  | 1.19<br>(0.94, 1.43)  | 1.44<br>(0.30, 2.58)  |
| Pol3<br>(n=10)  | 9.4<br>(-3.4, 22.1)        | 14.3<br>(-6.0, 34.7)        | 28.7<br>(-27.5, 84.9)  | 1.11<br>(0.96, 1.25)  | 1.17<br>(0.92, 1.43)  | 1.40<br>(0.43, 2.38)  |
| RCV1<br>(n=10)  | 12.0<br>(-1.8, 25.8)       | 9.4<br>(-11.2, 30.0)        | 29.3<br>(-18.9, 77.6)  | 1.14<br>(0.97, 1.31)  | 1.11<br>(0.86, 1.36)  | 1.42<br>(0.53, 2.31)  |
| MCV1<br>(n=10)  | 13.2<br>(-2.0, 28.4)       | 10.3<br>(-12.4, 33.1)       | 32.3<br>(-20.8, 85.4)  | 1.15<br>(0.96, 1.34)  | 1.12<br>(0.84, 1.40)  | 1.46<br>(0.48, 2.44)  |
| MCV2<br>(n=10)  | 17.3<br>(-7.2, 41.8)       | 10.1<br>(-25.2, 45.4)       | 22.7<br>(-38.4, 83.7)  | 1.22<br>(0.88, 1.56)  | 1.13<br>(0.67, 1.59)  | 1.33<br>(0.30, 2.36)  |
| HepB3<br>(n=10) | 8.0<br>(-4.7, 20.6)        | 15.7<br>(-3.7, 35.2)        | 30.8<br>(-31.5, 93.1)  | 1.09<br>(0.94, 1.23)  | 1.19<br>(0.94, 1.44)  | 1.44<br>(0.30, 2.58)  |
| Hib3<br>(n=9)   | 7.5<br>(-8.2, 23.2)        | 14.5<br>(-9.4, 38.4)        | 29.0<br>(-39.5, 97.5)  | 1.08<br>(0.90, 1.26)  | 1.18<br>(0.87, 1.48)  | 1.42<br>(0.18, 2.66)  |
| PCV3<br>(n=6)   | -69.8<br>(-216.4,<br>76.8) | -17.2<br>(-219.1,<br>184.7) | 7.2<br>(-202.0, 216.4) | 0.25<br>(-0.60, 1.11) | 0.77<br>(-1.67, 3.20) | 1.14<br>(-3.05, 5.32) |
| RotaC<br>(n=1)  | -                          | -                           | -                      | -                     | -                     | -                     |



| The Western Pacific Region |                       |                       |                        |                      |                      |                       |
|----------------------------|-----------------------|-----------------------|------------------------|----------------------|----------------------|-----------------------|
| BCG<br>(n=22)              | 25.6<br>(8.0, 43.2)   | 28.3<br>(7.7, 48.8)   | 42.6<br>(15.7, 69.6)   | 1.32<br>(1.05, 1.60) | 1.36<br>(1.03, 1.69) | 1.64<br>(1.07, 2.21)  |
| DTP1<br>(n=25)             | 13.5<br>(-3.0, 29.9)  | 20.6<br>(0.7, 40.5)   | 29.4<br>(5.2, 53.6)    | 1.15<br>(0.94, 1.36) | 1.25<br>(0.97, 1.52) | 1.38<br>(0.99, 1.77)  |
| DTP3<br>(n=25)             | 25.0<br>(5.8, 44.1)   | 26.1<br>(4.6, 47.6)   | 39.0<br>(15.2, 62.8)   | 1.32<br>(1.01, 1.63) | 1.34<br>(1.00, 1.68) | 1.57<br>(1.09, 2.06)  |
| Pol3<br>(n=25)             | 23.5<br>(6.3, 40.7)   | 29.1<br>(9.5, 48.8)   | 39.8<br>(16.8, 62.9)   | 1.30<br>(1.03, 1.57) | 1.39<br>(1.06, 1.72) | 1.60<br>(1.11, 2.08)  |
| RCV1<br>(n=25)             | 21.3<br>(3.7, 38.8)   | 29.2<br>(12.6, 45.8)  | 47.1<br>(26.8, 67.5)   | 1.27<br>(1.00, 1.54) | 1.40<br>(1.11, 1.68) | 1.77<br>(1.27, 2.27)  |
| MCV1<br>(n=25)             | 20.9<br>(3.2, 38.5)   | 29.2<br>(12.6, 45.8)  | 47.1<br>(26.8, 67.5)   | 1.26<br>(1.00, 1.53) | 1.40<br>(1.11, 1.68) | 1.77<br>(1.27, 2.27)  |
| MCV2<br>(n=24)             | 36.8<br>(8.6, 65.0)   | 44.7<br>(19.0, 70.5)  | 62.0<br>(35.7, 88.3)   | 1.58<br>(0.94, 2.22) | 1.76<br>(1.10, 2.43) | 2.36<br>(1.28, 3.44)  |
| HepB3<br>(n=25)            | 24.4<br>(5.5, 43.3)   | 24.9<br>(3.2, 46.6)   | 36.7<br>(12.5, 61.0)   | 1.31<br>(1.01, 1.62) | 1.32<br>(0.98, 1.66) | 1.53<br>(1.06, 2.00)  |
| Hib3<br>(n=24)             | 19.9<br>(-6.8, 46.5)  | 24.6<br>(0.4, 48.7)   | 41.5<br>(13.4, 69.6)   | 1.26<br>(0.86, 1.65) | 1.32<br>(0.94, 1.70) | 1.64<br>(1.03, 2.25)  |
| PCV3<br>(n=16)             | 19.4<br>(-20.6, 59.3) | 20.1<br>(-14.1, 54.3) | 32.9<br>(-4.3, 70.0)   | 1.28<br>(0.60, 1.95) | 1.28<br>(0.72, 1.84) | 1.51<br>(0.74, 2.28)  |
| RotaC<br>(n=7)             | 30.5<br>(-35.3, 96.3) | 39.2<br>(-19.1, 97.6) | 47.2<br>(-10.1, 104.5) | 1.47<br>(0.05, 2.89) | 1.67<br>(0.09, 3.25) | 1.88<br>(-0.01, 3.77) |

Data source: WHO-UNICEF Estimates of National Immunization Coverage (WUENIC): 2021 revision

Notes: \* SII is measured in percentage points. BCG, Bacillus Calmette-Guérin vaccine; DTP, diphtheria-tetanus-pertussis vaccine; Pol, Polio vaccine; RCV1, rubella-containing vaccine; MCV, measles-containing vaccine; HepB, Hepatitis B vaccine; Hib, Haemophilus influenzae type b vaccine; PCV, pneumococcal conjugate vaccine, RotaC, completed rotavirus vaccine.

**Webappendix table 7: Bonferroni-adjusted results of Jonckheere-Terpstra test and Willcoxon-Mann-Whitney rank sum test by region, combining values of 11 vaccines**

| Region                           | <i>P</i> -value of Jonckheere-Terpstra test |        | <i>P</i> -value of Willcoxon-Mann-Whitney rank sum test |        |
|----------------------------------|---------------------------------------------|--------|---------------------------------------------------------|--------|
|                                  | SII                                         | RII    | SII                                                     | RII    |
| Global                           | 0.3506                                      | 0.2272 | 0.4972                                                  | 0.3906 |
| The African Region               | 1.0000                                      | 1.0000 | 1.0000                                                  | 1.0000 |
| The Region of the Americas       | 0.0210                                      | 0.0063 | 0.0100                                                  | 0.0096 |
| The Eastern Mediterranean Region | 1.0000                                      | 1.0000 | 1.0000                                                  | 1.0000 |
| The European Region              | 1.0000                                      | 1.0000 | 1.0000                                                  | 1.0000 |
| The South-East Asian Region      | 0.0004                                      | 0.0001 | 0.0163                                                  | 0.0035 |
| The Western Pacific Region       | 0.0001                                      | 0.0003 | 0.0023                                                  | 0.0029 |

Data source: WHO-UNICEF Estimates of National Immunization Coverage (WUENIC): 2021 revision

Notes: The Jonckheere-Terpstra test used data in 2019-2021, and the Willcoxon-Mann-Whitney rank sum test used data in 2019 and 2021. Since the commands do not directly incorporate multiplicity correction methods, the Bonferroni adjustment was performed by taking the observed (uncorrected) *p*-values and multiplying them by the number of comparisons (11 vaccines). *P*-values larger than 1.0 after adjustment were recorded as 1.0. A two-sided *p*-value below 0.05 was considered statistically significant.

**Webappendix table 8: Changes in DTP3 coverage rate from 2019 to 2021 in 195 countries and territories**

| Income group | Country code | Country name              | DTP3 coverage |          |                                   |
|--------------|--------------|---------------------------|---------------|----------|-----------------------------------|
|              |              |                           | 2019 (%)      | 2021 (%) | Difference<br>(Percentage points) |
| Low          | AFG          | Afghanistan               | 72            | 66       | -6                                |
| Low          | BDI          | Burundi                   | 93            | 94       | 1                                 |
| Low          | BFA          | Burkina Faso              | 91            | 91       | 0                                 |
| Low          | CAF          | Central African Republic  | 42            | 42       | 0                                 |
| Low          | COD          | Congo, Dem. Rep.          | 73            | 65       | -8                                |
| Low          | ERI          | Eritrea                   | 95            | 95       | 0                                 |
| Low          | ETH          | Ethiopia                  | 68            | 65       | -3                                |
| Low          | GIN          | Guinea                    | 47            | 47       | 0                                 |
| Low          | GMB          | Gambia, The               | 88            | 82       | -6                                |
| Low          | GNB          | Guinea-Bissau             | 78            | 67       | -11                               |
| Low          | LBR          | Liberia                   | 70            | 66       | -4                                |
| Low          | MDG          | Madagascar                | 68            | 55       | -13                               |
| Low          | MLI          | Mali                      | 77            | 77       | 0                                 |
| Low          | MOZ          | Mozambique                | 88            | 61       | -27                               |
| Low          | MWI          | Malawi                    | 95            | 93       | -2                                |
| Low          | NER          | Niger                     | 81            | 82       | 1                                 |
| Low          | PRK          | Korea, Dem. People's Rep. | 97            | 41       | -56                               |
| Low          | RWA          | Rwanda                    | 98            | 88       | -10                               |
| Low          | SDN          | Sudan                     | 93            | 84       | -9                                |
| Low          | SLE          | Sierra Leone              | 95            | 92       | -3                                |
| Low          | SOM          | Somalia                   | 42            | 42       | 0                                 |
| Low          | SSD          | South Sudan               | 49            | 49       | 0                                 |
| Low          | SYR          | Syrian Arab Republic      | 54            | 48       | -6                                |
| Low          | TCD          | Chad                      | 50            | 58       | 8                                 |
| Low          | TGO          | Togo                      | 84            | 83       | -1                                |
| Low          | UGA          | Uganda                    | 93            | 91       | -2                                |
| Low          | YEM          | Yemen, Rep.               | 73            | 72       | -1                                |
| Low          | ZMB          | Zambia                    | 88            | 91       | 3                                 |
| Lower middle | AGO          | Angola                    | 57            | 45       | -12                               |
| Lower middle | BEN          | Benin                     | 76            | 76       | 0                                 |
| Lower middle | BGD          | Bangladesh                | 98            | 98       | 0                                 |
| Lower middle | BOL          | Bolivia                   | 75            | 70       | -5                                |
| Lower middle | BTN          | Bhutan                    | 97            | 98       | 1                                 |
| Lower middle | CIV          | Côte d'Ivoire             | 81            | 76       | -5                                |
| Lower middle | CMR          | Cameroon                  | 67            | 69       | 2                                 |
| Lower middle | COG          | Congo, Rep.               | 79            | 77       | -2                                |
| Lower middle | COM          | Comoros                   | 91            | 85       | -6                                |
| Lower middle | CPV          | Cabo Verde                | 96            | 93       | -3                                |

|              |     |                       |    |    |     |
|--------------|-----|-----------------------|----|----|-----|
| Lower middle | DJI | Djibouti              | 85 | 59 | -26 |
| Lower middle | DZA | Algeria               | 91 | 91 | 0   |
| Lower middle | EGY | Egypt, Arab Rep.      | 95 | 96 | 1   |
| Lower middle | FSM | Micronesia, Fed. Sts. | 78 | 72 | -6  |
| Lower middle | GHA | Ghana                 | 97 | 98 | 1   |
| Lower middle | HND | Honduras              | 88 | 77 | -11 |
| Lower middle | HTI | Haiti                 | 51 | 51 | 0   |
| Lower middle | IDN | Indonesia             | 85 | 67 | -18 |
| Lower middle | IND | India                 | 91 | 85 | -6  |
| Lower middle | IRN | Iran, Islamic Rep.    | 99 | 98 | -1  |
| Lower middle | KEN | Kenya                 | 91 | 91 | 0   |
| Lower middle | KGZ | Kyrgyz Republic       | 95 | 89 | -6  |
| Lower middle | KHM | Cambodia              | 92 | 92 | 0   |
| Lower middle | KIR | Kiribati              | 97 | 92 | -5  |
| Lower middle | LAO | Lao PDR               | 80 | 75 | -5  |
| Lower middle | LBN | Lebanon               | 83 | 67 | -16 |
| Lower middle | LKA | Sri Lanka             | 99 | 96 | -3  |
| Lower middle | LSO | Lesotho               | 87 | 87 | 0   |
| Lower middle | MAR | Morocco               | 99 | 99 | 0   |
| Lower middle | MMR | Myanmar               | 90 | 37 | -53 |
| Lower middle | MNG | Mongolia              | 98 | 95 | -3  |
| Lower middle | MRT | Mauritania            | 80 | 68 | -12 |
| Lower middle | NGA | Nigeria               | 56 | 56 | 0   |
| Lower middle | NIC | Nicaragua             | 98 | 87 | -11 |
| Lower middle | NPL | Nepal                 | 93 | 91 | -2  |
| Lower middle | PAK | Pakistan              | 84 | 83 | -1  |
| Lower middle | PHL | Philippines           | 71 | 57 | -14 |
| Lower middle | PNG | Papua New Guinea      | 35 | 31 | -4  |
| Lower middle | PSE | West Bank and Gaza    | 99 | 95 | -4  |
| Lower middle | SEN | Senegal               | 95 | 85 | -10 |
| Lower middle | SLB | Solomon Islands       | 94 | 87 | -7  |
| Lower middle | SLV | El Salvador           | 81 | 79 | -2  |
| Lower middle | STP | São Tomé and Príncipe | 95 | 97 | 2   |
| Lower middle | SWZ | Eswatini              | 90 | 77 | -13 |
| Lower middle | TJK | Tajikistan            | 97 | 97 | 0   |
| Lower middle | TLS | Timor-Leste           | 90 | 86 | -4  |
| Lower middle | TUN | Tunisia               | 98 | 97 | -1  |
| Lower middle | TZA | Tanzania              | 89 | 81 | -8  |
| Lower middle | UKR | Ukraine               | 80 | 78 | -2  |
| Lower middle | UZB | Uzbekistan            | 96 | 98 | 2   |
| Lower middle | VEN | Venezuela, RB         | 64 | 56 | -8  |
| Lower middle | VNM | Vietnam               | 89 | 83 | -6  |
| Lower middle | VUT | Vanuatu               | 90 | 62 | -28 |
| Lower middle | WSM | Samoa                 | 68 | 85 | 17  |

|              |     |                        |    |    |     |
|--------------|-----|------------------------|----|----|-----|
| Lower middle | ZWE | Zimbabwe               | 90 | 86 | -4  |
| Upper middle | ALB | Albania                | 99 | 98 | -1  |
| Upper middle | ARG | Argentina              | 83 | 76 | -7  |
| Upper middle | ARM | Armenia                | 92 | 93 | 1   |
| Upper middle | AZE | Azerbaijan             | 94 | 89 | -5  |
| Upper middle | BGR | Bulgaria               | 93 | 89 | -4  |
| Upper middle | BIH | Bosnia and Herzegovina | 73 | 73 | 0   |
| Upper middle | BLR | Belarus                | 98 | 98 | 0   |
| Upper middle | BLZ | Belize                 | 98 | 83 | -15 |
| Upper middle | BRA | Brazil                 | 70 | 68 | -2  |
| Upper middle | BWA | Botswana               | 95 | 95 | 0   |
| Upper middle | CHN | China                  | 99 | 99 | 0   |
| Upper middle | COL | Colombia               | 94 | 86 | -8  |
| Upper middle | CRI | Costa Rica             | 95 | 99 | 4   |
| Upper middle | CUB | Cuba                   | 99 | 99 | 0   |
| Upper middle | DMA | Dominica               | 99 | 92 | -7  |
| Upper middle | DOM | Dominican Republic     | 89 | 84 | -5  |
| Upper middle | ECU | Ecuador                | 85 | 72 | -13 |
| Upper middle | FJI | Fiji                   | 99 | 99 | 0   |
| Upper middle | GAB | Gabon                  | 70 | 75 | 5   |
| Upper middle | GEO | Georgia                | 94 | 85 | -9  |
| Upper middle | GNQ | Equatorial Guinea      | 53 | 53 | 0   |
| Upper middle | GRD | Grenada                | 92 | 72 | -20 |
| Upper middle | GTM | Guatemala              | 85 | 79 | -6  |
| Upper middle | GUY | Guyana                 | 99 | 91 | -8  |
| Upper middle | IRQ | Iraq                   | 84 | 78 | -6  |
| Upper middle | JAM | Jamaica                | 96 | 90 | -6  |
| Upper middle | JOR | Jordan                 | 89 | 77 | -12 |
| Upper middle | KAZ | Kazakhstan             | 97 | 95 | -2  |
| Upper middle | LBY | Libya                  | 73 | 73 | 0   |
| Upper middle | LCA | St. Lucia              | 92 | 80 | -12 |
| Upper middle | MDA | Moldova                | 91 | 87 | -4  |
| Upper middle | MDV | Maldives               | 98 | 96 | -2  |
| Upper middle | MEX | Mexico                 | 82 | 78 | -4  |
| Upper middle | MHL | Marshall Islands       | 79 | 86 | 7   |
| Upper middle | MKD | North Macedonia        | 92 | 81 | -11 |
| Upper middle | MNE | Montenegro             | 85 | 83 | -2  |
| Upper middle | MUS | Mauritius              | 96 | 92 | -4  |
| Upper middle | MYS | Malaysia               | 98 | 95 | -3  |
| Upper middle | NAM | Namibia                | 87 | 93 | 6   |
| Upper middle | PER | Peru                   | 88 | 82 | -6  |
| Upper middle | PLW | Palau                  | 97 | 95 | -2  |
| Upper middle | PRY | Paraguay               | 86 | 70 | -16 |
| Upper middle | RUS | Russian Federation     | 97 | 97 | 0   |

|              |     |                                   |    |    |     |
|--------------|-----|-----------------------------------|----|----|-----|
| Upper middle | SRB | Serbia                            | 97 | 92 | -5  |
| Upper middle | SUR | Suriname                          | 77 | 72 | -5  |
| Upper middle | THA | Thailand                          | 97 | 97 | 0   |
| Upper middle | TKM | Turkmenistan                      | 99 | 97 | -2  |
| Upper middle | TON | Tonga                             | 99 | 99 | 0   |
| Upper middle | TUR | Türkiye                           | 99 | 95 | -4  |
| Upper middle | TUV | Tuvalu                            | 92 | 94 | 2   |
| Upper middle | VCT | St. Vincent and the<br>Grenadines | 97 | 97 | 0   |
| Upper middle | ZAF | South Africa                      | 85 | 86 | 1   |
| High         | AND | Andorra                           | 99 | 99 | 0   |
| High         | ARE | United Arab Emirates              | 99 | 96 | -3  |
| High         | ATG | Antigua and Barbuda               | 95 | 92 | -3  |
| High         | AUS | Australia                         | 95 | 95 | 0   |
| High         | AUT | Austria                           | 85 | 85 | 0   |
| High         | BEL | Belgium                           | 97 | 98 | 1   |
| High         | BHR | Bahrain                           | 99 | 98 | -1  |
| High         | BHS | Bahamas, The                      | 89 | 75 | -14 |
| High         | BRB | Barbados                          | 90 | 82 | -8  |
| High         | BRN | Brunei Darussalam                 | 99 | 99 | 0   |
| High         | CAN | Canada                            | 91 | 92 | 1   |
| High         | CHE | Switzerland                       | 96 | 96 | 0   |
| High         | CHL | Chile                             | 96 | 95 | -1  |
| High         | COK | Cook Islands                      | 98 | 98 | 0   |
| High         | CYP | Cyprus                            | 96 | 96 | 0   |
| High         | CZE | Czech Republic                    | 97 | 94 | -3  |
| High         | DEU | Germany                           | 91 | 91 | 0   |
| High         | DNK | Denmark                           | 97 | 97 | 0   |
| High         | ESP | Spain                             | 95 | 92 | -3  |
| High         | EST | Estonia                           | 91 | 90 | -1  |
| High         | FIN | Finland                           | 91 | 89 | -2  |
| High         | FRA | France                            | 96 | 96 | 0   |
| High         | GBR | United Kingdom                    | 93 | 93 | 0   |
| High         | GRC | Greece                            | 99 | 99 | 0   |
| High         | HRV | Croatia                           | 94 | 92 | -2  |
| High         | HUN | Hungary                           | 99 | 99 | 0   |
| High         | IRL | Ireland                           | 94 | 94 | 0   |
| High         | ISL | Iceland                           | 92 | 92 | 0   |
| High         | ISR | Israel                            | 98 | 98 | 0   |
| High         | ITA | Italy                             | 96 | 94 | -2  |
| High         | JPN | Japan                             | 98 | 96 | -2  |
| High         | KNA | St. Kitts and Nevis               | 97 | 96 | -1  |
| High         | KOR | Korea, Rep.                       | 98 | 98 | 0   |
| High         | KWT | Kuwait                            | 92 | 94 | 2   |

|                        |     |                     |      |      |      |
|------------------------|-----|---------------------|------|------|------|
| High                   | LTU | Lithuania           | 92   | 90   | -2   |
| High                   | LUX | Luxembourg          | 99   | 99   | 0    |
| High                   | LVA | Latvia              | 99   | 94   | -5   |
| High                   | MCO | Monaco              | 99   | 99   | 0    |
| High                   | MLT | Malta               | 98   | 99   | 1    |
| High                   | NIU | Niue                | 99   | 99   | 0    |
| High                   | NLD | Netherlands         | 94   | 95   | 1    |
| High                   | NOR | Norway              | 97   | 97   | 0    |
| High                   | NRU | Nauru               | 96   | 98   | 2    |
| High                   | NZL | New Zealand         | 92   | 90   | -2   |
| High                   | OMN | Oman                | 99   | 99   | 0    |
| High                   | PAN | Panama              | 88   | 74   | -14  |
| High                   | POL | Poland              | 95   | 90   | -5   |
| High                   | PRT | Portugal            | 99   | 99   | 0    |
| High                   | QAT | Qatar               | 98   | 98   | 0    |
| High                   | ROU | Romania             | 88   | 86   | -2   |
| High                   | SAU | Saudi Arabia        | 96   | 97   | 1    |
| High                   | SGP | Singapore           | 96   | 96   | 0    |
| High                   | SMR | San Marino          | 88   | 90   | 2    |
| High                   | SVK | Slovak Republic     | 97   | 97   | 0    |
| High                   | SVN | Slovenia            | 95   | 86   | -9   |
| High                   | SWE | Sweden              | 98   | 98   | 0    |
| High                   | SYC | Seychelles          | 99   | 94   | -5   |
| High                   | TTO | Trinidad and Tobago | 93   | 94   | 1    |
| High                   | URY | Uruguay             | 94   | 89   | -5   |
| High                   | USA | United States       | 94   | 93   | -1   |
| World weighted average |     |                     | 86.2 | 81.4 | -4.8 |

Data source: WHO-UNICEF Estimates of National Immunization Coverage (WUENIC): 2021 revision

**Webappendix table 9: Number of DTP3 unvaccinated children in 2021 in 195 countries and territories**

| Income group | Country code | Country name              | Children <1 year in 2021 (thousand) | DTP3 coverage in 2021 | Unvaccinated children in 2021 (thousand) |
|--------------|--------------|---------------------------|-------------------------------------|-----------------------|------------------------------------------|
| Low          | AFG          | Afghanistan               | 1324                                | 66%                   | 450                                      |
| Low          | BDI          | Burundi                   | 415                                 | 94%                   | 25                                       |
| Low          | BFA          | Burkina Faso              | 728                                 | 91%                   | 66                                       |
| Low          | CAF          | Central African Republic  | 204                                 | 42%                   | 118                                      |
| Low          | COD          | Congo, Dem. Rep.          | 3657                                | 65%                   | 1280                                     |
| Low          | ERI          | Eritrea                   | 98                                  | 95%                   | 5                                        |
| Low          | ETH          | Ethiopia                  | 3669                                | 65%                   | 1284                                     |
| Low          | GIN          | Guinea                    | 426                                 | 47%                   | 226                                      |
| Low          | GMB          | Gambia, The               | 83                                  | 82%                   | 15                                       |
| Low          | GNB          | Guinea-Bissau             | 60                                  | 67%                   | 20                                       |
| Low          | LBR          | Liberia                   | 151                                 | 66%                   | 51                                       |
| Low          | MDG          | Madagascar                | 845                                 | 55%                   | 380                                      |
| Low          | MLI          | Mali                      | 825                                 | 77%                   | 190                                      |
| Low          | MOZ          | Mozambique                | 1077                                | 61%                   | 420                                      |
| Low          | MWI          | Malawi                    | 619                                 | 93%                   | 43                                       |
| Low          | NER          | Niger                     | 1037                                | 82%                   | 187                                      |
| Low          | PRK          | Korea, Dem. People's Rep. | 341                                 | 41%                   | 201                                      |
| Low          | RWA          | Rwanda                    | 384                                 | 88%                   | 46                                       |
| Low          | SDN          | Sudan                     | 1449                                | 84%                   | 232                                      |
| Low          | SLE          | Sierra Leone              | 241                                 | 92%                   | 19                                       |
| Low          | SOM          | Somalia                   | 662                                 | 42%                   | 384                                      |
| Low          | SSD          | South Sudan               | 285                                 | 49%                   | 145                                      |
| Low          | SYR          | Syrian Arab Republic      | 393                                 | 48%                   | 204                                      |
| Low          | TCD          | Chad                      | 667                                 | 58%                   | 280                                      |
| Low          | TGO          | Togo                      | 258                                 | 83%                   | 44                                       |
| Low          | UGA          | Uganda                    | 1581                                | 91%                   | 142                                      |
| Low          | YEM          | Yemen, Rep.               | 955                                 | 72%                   | 267                                      |
| Low          | ZMB          | Zambia                    | 626                                 | 91%                   | 56                                       |
| Lower middle | AGO          | Angola                    | 1229                                | 45%                   | 676                                      |
| Lower middle | BEN          | Benin                     | 438                                 | 76%                   | 105                                      |
| Lower middle | BGD          | Bangladesh                | 2952                                | 98%                   | 59                                       |
| Lower middle | BOL          | Bolivia                   | 255                                 | 70%                   | 77                                       |
| Lower middle | BTN          | Bhutan                    | 10                                  | 98%                   | 0                                        |
| Lower middle | CIV          | Côte d'Ivoire             | 853                                 | 76%                   | 205                                      |
| Lower middle | CMR          | Cameroon                  | 885                                 | 69%                   | 274                                      |
| Lower middle | COG          | Congo, Rep.               | 171                                 | 77%                   | 39                                       |
| Lower middle | COM          | Comoros                   | 23                                  | 85%                   | 3                                        |
| Lower middle | CPV          | Cabo Verde                | 10                                  | 93%                   | 1                                        |



|              |     |                       |       |     |      |
|--------------|-----|-----------------------|-------|-----|------|
| Lower middle | DJI | Djibouti              | 23    | 59% | 10   |
| Lower middle | DZA | Algeria               | 965   | 91% | 87   |
| Lower middle | EGY | Egypt, Arab Rep.      | 2439  | 96% | 98   |
| Lower middle | FSM | Micronesia, Fed. Sts. | 2     | 72% | 1    |
| Lower middle | GHA | Ghana                 | 870   | 98% | 17   |
| Lower middle | HND | Honduras              | 213   | 77% | 49   |
| Lower middle | HTI | Haiti                 | 257   | 51% | 126  |
| Lower middle | IDN | Indonesia             | 4451  | 67% | 1469 |
| Lower middle | IND | India                 | 22687 | 85% | 3403 |
| Lower middle | IRN | Iran, Islamic Rep.    | 1258  | 98% | 25   |
| Lower middle | KEN | Kenya                 | 1393  | 91% | 125  |
| Lower middle | KGZ | Kyrgyz Republic       | 161   | 89% | 18   |
| Lower middle | KHM | Cambodia              | 320   | 92% | 26   |
| Lower middle | KIR | Kiribati              | 3     | 92% | 0    |
| Lower middle | LAO | Lao PDR               | 158   | 75% | 39   |
| Lower middle | LBN | Lebanon               | 83    | 67% | 27   |
| Lower middle | LKA | Sri Lanka             | 308   | 96% | 12   |
| Lower middle | LSO | Lesotho               | 55    | 87% | 7    |
| Lower middle | MAR | Morocco               | 650   | 99% | 6    |
| Lower middle | MMR | Myanmar               | 897   | 37% | 565  |
| Lower middle | MNG | Mongolia              | 74    | 95% | 4    |
| Lower middle | MRT | Mauritania            | 142   | 68% | 45   |
| Lower middle | NGA | Nigeria               | 7130  | 56% | 3137 |
| Lower middle | NIC | Nicaragua             | 139   | 87% | 18   |
| Lower middle | NPL | Nepal                 | 592   | 91% | 53   |
| Lower middle | PAK | Pakistan              | 5974  | 83% | 1016 |
| Lower middle | PHL | Philippines           | 2407  | 57% | 1035 |
| Lower middle | PNG | Papua New Guinea      | 243   | 31% | 168  |
| Lower middle | PSE | West Bank and Gaza    | 142   | 95% | 7    |
| Lower middle | SEN | Senegal               | 524   | 85% | 79   |
| Lower middle | SLB | Solomon Islands       | 20    | 87% | 3    |
| Lower middle | SLV | El Salvador           | 101   | 79% | 21   |
| Lower middle | STP | São Tomé and Príncipe | 6     | 97% | 0    |
| Lower middle | SWZ | Eswatini              | 28    | 77% | 6    |
| Lower middle | TJK | Tajikistan            | 256   | 97% | 8    |
| Lower middle | TLS | Timor-Leste           | 32    | 86% | 4    |
| Lower middle | TUN | Tunisia               | 202   | 97% | 6    |
| Lower middle | TZA | Tanzania              | 2157  | 81% | 410  |
| Lower middle | UKR | Ukraine               | 344   | 78% | 76   |
| Lower middle | UZB | Uzbekistan            | 806   | 98% | 16   |
| Lower middle | VEN | Venezuela, RB         | 455   | 56% | 200  |
| Lower middle | VNM | Vietnam               | 1469  | 83% | 250  |
| Lower middle | VUT | Vanuatu               | 9     | 62% | 3    |
| Lower middle | WSM | Samoa                 | 6     | 85% | 1    |

|              |     |                        |       |     |     |
|--------------|-----|------------------------|-------|-----|-----|
| Lower middle | ZWE | Zimbabwe               | 465   | 86% | 65  |
| Upper middle | ALB | Albania                | 28    | 98% | 1   |
| Upper middle | ARG | Argentina              | 642   | 76% | 154 |
| Upper middle | ARM | Armenia                | 35    | 93% | 2   |
| Upper middle | AZE | Azerbaijan             | 137   | 89% | 15  |
| Upper middle | BGR | Bulgaria               | 60    | 89% | 7   |
| Upper middle | BIH | Bosnia and Herzegovina | 30    | 73% | 8   |
| Upper middle | BLR | Belarus                | 90    | 98% | 2   |
| Upper middle | BLZ | Belize                 | 7     | 83% | 1   |
| Upper middle | BRA | Brazil                 | 2800  | 68% | 896 |
| Upper middle | BWA | Botswana               | 60    | 95% | 3   |
| Upper middle | CHN | China                  | 13347 | 99% | 133 |
| Upper middle | COL | Colombia               | 733   | 86% | 103 |
| Upper middle | CRI | Costa Rica             | 63    | 99% | 1   |
| Upper middle | CUB | Cuba                   | 107   | 99% | 1   |
| Upper middle | DMA | Dominica               | 1     | 92% | 0   |
| Upper middle | DOM | Dominican Republic     | 202   | 84% | 32  |
| Upper middle | ECU | Ecuador                | 298   | 72% | 83  |
| Upper middle | FJI | Fiji                   | 18    | 99% | 0   |
| Upper middle | GAB | Gabon                  | 61    | 75% | 15  |
| Upper middle | GEO | Georgia                | 49    | 85% | 7   |
| Upper middle | GNQ | Equatorial Guinea      | 47    | 53% | 22  |
| Upper middle | GRD | Grenada                | 2     | 72% | 1   |
| Upper middle | GTM | Guatemala              | 376   | 79% | 79  |
| Upper middle | GUY | Guyana                 | 16    | 91% | 1   |
| Upper middle | IRQ | Iraq                   | 1148  | 78% | 253 |
| Upper middle | JAM | Jamaica                | 33    | 90% | 3   |
| Upper middle | JOR | Jordan                 | 240   | 77% | 55  |
| Upper middle | KAZ | Kazakhstan             | 412   | 95% | 21  |
| Upper middle | LBY | Libya                  | 121   | 73% | 33  |
| Upper middle | LCA | St. Lucia              | 2     | 80% | 0   |
| Upper middle | MDA | Moldova                | 39    | 87% | 5   |
| Upper middle | MDV | Maldives               | 8     | 96% | 0   |
| Upper middle | MEX | Mexico                 | 1938  | 78% | 426 |
| Upper middle | MHL | Marshall Islands       | 1     | 86% | 0   |
| Upper middle | MKD | North Macedonia        | 20    | 81% | 4   |
| Upper middle | MNE | Montenegro             | 7     | 83% | 1   |
| Upper middle | MUS | Mauritius              | 13    | 92% | 1   |
| Upper middle | MYS | Malaysia               | 509   | 95% | 25  |
| Upper middle | NAM | Namibia                | 67    | 93% | 5   |
| Upper middle | PER | Peru                   | 588   | 82% | 106 |
| Upper middle | PLW | Palau                  | 0     | 95% | 0   |
| Upper middle | PRY | Paraguay               | 136   | 70% | 41  |
| Upper middle | RUS | Russian Federation     | 1466  | 97% | 44  |

|              |     |                      |      |     |     |
|--------------|-----|----------------------|------|-----|-----|
| Upper middle | SRB | Serbia               | 69   | 92% | 6   |
| Upper middle | SUR | Suriname             | 11   | 72% | 3   |
| Upper middle | THA | Thailand             | 658  | 97% | 20  |
| Upper middle | TKM | Turkmenistan         | 135  | 97% | 4   |
| Upper middle | TON | Tonga                | 2    | 99% | 0   |
| Upper middle | TUR | Türkiye              | 1270 | 95% | 63  |
| Upper middle | TUV | Tuvalu               | 0    | 94% | 0   |
|              |     | St. Vincent and the  |      |     |     |
| Upper middle | VCT | Grenadines           | 1    | 97% | 0   |
| Upper middle | ZAF | South Africa         | 1185 | 86% | 166 |
| High         | AND | Andorra              | 0    | 99% | 0   |
| High         | ARE | United Arab Emirates | 98   | 96% | 4   |
| High         | ATG | Antigua and Barbuda  | 1    | 92% | 0   |
| High         | AUS | Australia            | 304  | 95% | 15  |
| High         | AUT | Austria              | 84   | 85% | 13  |
| High         | BEL | Belgium              | 117  | 98% | 2   |
| High         | BHR | Bahrain              | 19   | 98% | 0   |
| High         | BHS | Bahamas, The         | 5    | 75% | 1   |
| High         | BRB | Barbados             | 3    | 82% | 1   |
| High         | BRN | Brunei Darussalam    | 6    | 99% | 0   |
| High         | CAN | Canada               | 375  | 92% | 30  |
| High         | CHE | Switzerland          | 85   | 96% | 3   |
| High         | CHL | Chile                | 229  | 95% | 11  |
| High         | COK | Cook Islands         | 0    | 98% | 0   |
| High         | CYP | Cyprus               | 13   | 96% | 1   |
| High         | CZE | Czech Republic       | 109  | 94% | 7   |
| High         | DEU | Germany              | 777  | 91% | 70  |
| High         | DNK | Denmark              | 62   | 97% | 2   |
| High         | ESP | Spain                | 354  | 92% | 28  |
| High         | EST | Estonia              | 14   | 90% | 1   |
| High         | FIN | Finland              | 46   | 89% | 5   |
| High         | FRA | France               | 667  | 96% | 27  |
| High         | GBR | United Kingdom       | 698  | 93% | 49  |
| High         | GRC | Greece               | 83   | 99% | 1   |
| High         | HRV | Croatia              | 36   | 92% | 3   |
| High         | HUN | Hungary              | 93   | 99% | 1   |
| High         | IRL | Ireland              | 60   | 94% | 4   |
| High         | ISL | Iceland              | 5    | 92% | 0   |
| High         | ISR | Israel               | 180  | 98% | 4   |
| High         | ITA | Italy                | 413  | 94% | 25  |
| High         | JPN | Japan                | 825  | 96% | 33  |
| High         | KNA | St. Kitts and Nevis  | 1    | 96% | 0   |
| High         | KOR | Korea, Rep.          | 302  | 98% | 6   |
| High         | KWT | Kuwait               | 50   | 94% | 3   |

|                        |     |                     |        |       |       |
|------------------------|-----|---------------------|--------|-------|-------|
| High                   | LTU | Lithuania           | 27     | 90%   | 3     |
| High                   | LUX | Luxembourg          | 7      | 99%   | 0     |
| High                   | LVA | Latvia              | 18     | 94%   | 1     |
| High                   | MCO | Monaco              | 0      | 99%   | 0     |
| High                   | MLT | Malta               | 5      | 99%   | 0     |
| High                   | NIU | Niue                | 0      | 99%   | 0     |
| High                   | NLD | Netherlands         | 172    | 95%   | 9     |
| High                   | NOR | Norway              | 54     | 97%   | 2     |
| High                   | NRU | Nauru               | 0      | 98%   | 0     |
| High                   | NZL | New Zealand         | 62     | 90%   | 6     |
| High                   | OMN | Oman                | 87     | 99%   | 1     |
| High                   | PAN | Panama              | 76     | 74%   | 20    |
| High                   | POL | Poland              | 364    | 90%   | 36    |
| High                   | PRT | Portugal            | 86     | 99%   | 1     |
| High                   | QAT | Qatar               | 29     | 98%   | 1     |
| High                   | ROU | Romania             | 200    | 86%   | 28    |
| High                   | SAU | Saudi Arabia        | 647    | 97%   | 19    |
| High                   | SGP | Singapore           | 48     | 96%   | 2     |
| High                   | SMR | San Marino          | 0      | 90%   | 0     |
| High                   | SVK | Slovak Republic     | 57     | 97%   | 2     |
| High                   | SVN | Slovenia            | 20     | 86%   | 3     |
| High                   | SWE | Sweden              | 116    | 98%   | 2     |
| High                   | SYC | Seychelles          | 2      | 94%   | 0     |
| High                   | TTO | Trinidad and Tobago | 18     | 94%   | 1     |
| High                   | URY | Uruguay             | 36     | 89%   | 4     |
| High                   | USA | United States       | 3735   | 93%   | 261   |
| World weighted average |     |                     | 132071 | 81.4% | 24568 |

Data source: WHO-UNICEF Estimates of National Immunization Coverage (WUENIC): 2021 revision
